# Supplementary material
Source: PubMed Central journal article supplement (PMC2747765)
Supplement: NIHMS74935-supplement-Supplemental_Table_1.pdf [file NIHMS74935-supplement-Supplemental_Table_1.pdf]

1  
2  
3  
4  
5  
6  
7  
8  
9  
10  
11  
12  
13  
14  
15  
16  
17  
18  
19  
20  
21  
22  
23  
24  
25  
26  
27  
28  
29  
30  
31  
32  
33  
34  
35  
36  
37  
38  
39  
40  
41  
42  
43  
44  
45  
46  
47  
48  
49  
50  
51  
52  
53  
54  
55  
56  
57  
58  
59  
60  
61  
62  
63  
64  
65

| ETS       | I           | II          | III          | IV          | V          |
|-----------|-------------|-------------|--------------|-------------|------------|
| Inhibitor | MPTP        | 3-NP        | Antimycin-A  | Azide       | Oligomycin |
| Cho       | 67.0±11.7*  | 146.8±19.6* | 151.9±25.3** | 152.1±35.3* | 139.0±51.9 |
| PC        | 162.1±114.4 | 51.2±20.9** | 39.7±8.9***  | 112.1±55.4  | 47.0±17.9* |

**Supplemental Table. 1. Relative changes of Cho and PC following ETS complex inhibition measured by MALDI-TOF MS.** The percent ratios were calculated by the comparisons of the average ion counts measured for each metabolite vs. the respective control values after normalization. The values are given as means ± SD (n=5, \*: p<0.05; \*\*: p<0.01; \*\*\*: p<0.001).
